# Supplementary material for: Physiology and methane productivity of Methanobacterium thermaggregans
Source: PubMed Central journal article supplement (PMC6097776; doi:10.1007/s00253-018-9183-2), 2018-06-29
Supplement: 253_2018_9183_MOESM1_ESM.pdf [file 253_2018_9183_MOESM1_ESM.pdf]

# Applied Microbiology and Biotechnology

## Physiology and methane productivity of *Methanobacterium thermaggregans*

Lisa-Maria Mauerhofer<sup>1</sup>, Barbara Reischl<sup>1,2</sup>, Tilman Schmider<sup>1</sup>, Benjamin Schupp<sup>1</sup>, Kinga Nagy<sup>1,3</sup>, Patricia Pappenreiter<sup>4</sup>, Sara Zwirtmayr<sup>4</sup>, Bernhard Schuster<sup>3</sup>, Sébastien Bernacchi<sup>2</sup>, Arne H. Seifert<sup>2</sup>, Christian Paulik<sup>4</sup>, Simon K.-M. R. Rittmann<sup>1,\*</sup>

<sup>1</sup>Archaea Physiology & Biotechnology Group, Archaea Biology and Ecogenomics Division, Department of Ecogenomics and Systems Biology, Universität Wien, Wien, Austria

<sup>2</sup>Krajete GmbH, Linz, Austria

<sup>3</sup>Institute of Synthetic Bioarchitectures, Department of Nanobiotechnology, University of Natural Resources and Life Sciences, Wien, Austria

<sup>4</sup>Institute for Chemical Technology of Organic Materials, Johannes Kepler Universität Linz, Linz, Austria

\*Corresponding author:

Dr. Simon K.-M. R. Rittmann

Archaea Physiology & Biotechnology Group

Archaea Biology and Ecogenomics Division

Department of Ecogenomics and Systems Biology

Universität Wien

Althanstraße 14

1090 Wien

Austria

Tel.: +43-4277-76513

eFax.: +43-4277-876513

email: [simon.rittmann@univie.ac.at](mailto:simon.rittmann@univie.ac.at)

**Table S1:** ANOVA for Response Surface Reduced Quadratic Model  $x_{\max}$ 

| $x_{\max} = \text{Log}10((-35.24755687 + (0.762155327 * \text{Temperature}) + (3.190981698 * \text{pH}) + (-0.00623276 * \text{Temperature}^2) + (-0.211348003 * \text{pH}^2))$ |                      |    |                |              |              |                 |
|---------------------------------------------------------------------------------------------------------------------------------------------------------------------------------|----------------------|----|----------------|--------------|--------------|-----------------|
| Analysis of variance table [Partial sum of squares - Type III]                                                                                                                  |                      |    |                |              |              |                 |
| Source                                                                                                                                                                          | Sum of Squares       | df | Mean Square    | F Value      | p-value      |                 |
|                                                                                                                                                                                 |                      |    |                |              | Prob > F     |                 |
| Model                                                                                                                                                                           | 0.894493019          | 4  | 0.223623255    | 22.65421373  | < 0.0001     | significant     |
| A-Temperature                                                                                                                                                                   | 0.087490079          | 1  | 0.087490079    | 8.863205926  | 0.0089       |                 |
| B-pH                                                                                                                                                                            | 0.165839363          | 1  | 0.165839363    | 16.8004011   | 0.0008       |                 |
| A <sup>2</sup>                                                                                                                                                                  | 0.625867049          | 1  | 0.625867049    | 63.40362906  | < 0.0001     |                 |
| B <sup>2</sup>                                                                                                                                                                  | 0.037701654          | 1  | 0.037701654    | 3.819376161  | 0.0684       |                 |
| Residual                                                                                                                                                                        | 0.15793848           | 16 | 0.009871155    |              |              |                 |
| Lack of Fit                                                                                                                                                                     | 0.064093756          | 5  | 0.012818751    | 1.502548646  | 0.2660       | not significant |
| Pure Error                                                                                                                                                                      | 0.093844724          | 11 | 0.008531339    |              |              |                 |
| Cor Total                                                                                                                                                                       | 1.052431498          | 20 |                |              |              |                 |
| Std. Dev.                                                                                                                                                                       | 0.099353686          |    | R-Squared      | 0.84992992   |              |                 |
| Mean                                                                                                                                                                            | -0.149218223         |    | Adj R-Squared  | 0.812412399  |              |                 |
| C.V. %                                                                                                                                                                          | 66.58281013          |    | Pred R-Squared | 0.705255087  |              |                 |
| PRESS                                                                                                                                                                           | 0.310198831          |    | Adeq Precision | 16.83061995  |              |                 |
| Factor                                                                                                                                                                          | Coefficient Estimate | df | Standard Error | 95% CI Low   | 95% CI High  | VIF             |
| Intercept                                                                                                                                                                       | 0.024646613          | 1  | 0.033546624    | -0.046469053 | 0.095762279  |                 |
| A-Temperature                                                                                                                                                                   | 0.071120654          | 1  | 0.023889129    | 0.020477962  | 0.121763346  | 1.029638993     |
| B-pH                                                                                                                                                                            | 0.092843863          | 1  | 0.022651313    | 0.044825225  | 0.140862501  | 1.069259789     |
| A <sup>2</sup>                                                                                                                                                                  | -0.155818999         | 1  | 0.019568762    | -0.197302922 | -0.114335077 | 1.03079817      |
| B <sup>2</sup>                                                                                                                                                                  | -0.03381568          | 1  | 0.01730302     | -0.070496445 | 0.002865084  | 1.091888669     |

**Table S2:** ANOVA for Response Surface Reduced Quadratic Model  $r_{(x) \max}$

| $r_{(x) \max} = \text{Log}10(-43.55859742 + (0.894196753 * \text{Temperature}) + (4.532229376 * \text{pH}) + (-0.007334806 * \text{Temperature}^2) + (-0.304943494 * \text{pH}^2))$ |                      |    |                |              |             |                 |
|-------------------------------------------------------------------------------------------------------------------------------------------------------------------------------------|----------------------|----|----------------|--------------|-------------|-----------------|
| Analysis of variance table [Partial sum of squares - Type III]                                                                                                                      |                      |    |                |              |             |                 |
| Source                                                                                                                                                                              | Sum of Squares       | df | Mean Square    | F Value      | p-value     |                 |
| Model                                                                                                                                                                               | 1.21513411           | 4  | 0.303783527    | 15.31034354  | < 0.0001    | significant     |
| A-Temperature                                                                                                                                                                       | 0.084997108          | 1  | 0.084997108    | 4.283757371  | 0.0550      |                 |
| B-pH                                                                                                                                                                                | 0.21295129           | 1  | 0.21295129     | 10.73250231  | 0.0048      |                 |
| A <sup>2</sup>                                                                                                                                                                      | 0.86675941           | 1  | 0.86675941     | 43.68368639  | < 0.0001    |                 |
| B <sup>2</sup>                                                                                                                                                                      | 0.078487926          | 1  | 0.078487926    | 3.955701988  | 0.0641      |                 |
| Residual                                                                                                                                                                            | 0.317467497          | 16 | 0.019841719    |              |             |                 |
| Lack of Fit                                                                                                                                                                         | 0.069843725          | 5  | 0.013968745    | 0.620522797  | 0.6876      | not significant |
| Pure Error                                                                                                                                                                          | 0.247623772          | 11 | 0.022511252    |              |             |                 |
| Cor Total                                                                                                                                                                           | 1.532601606          | 20 |                |              |             |                 |
| Std. Dev.                                                                                                                                                                           | 0.140860635          |    | R-Squared      | 0.792857129  |             |                 |
| Mean                                                                                                                                                                                | 0.256961055          |    | Adj R-Squared  | 0.741071411  |             |                 |
| C.V. %                                                                                                                                                                              | 54.81789264          |    | Pred R-Squared | 0.660030587  |             |                 |
| PRESS                                                                                                                                                                               | 0.521037668          |    | Adeq Precision | 12.93314562  |             |                 |
| Factor                                                                                                                                                                              | Coefficient Estimate | df | Standard Error | 95% CI Low   | 95% CI High | VIF             |
| Intercept                                                                                                                                                                           | 0.471279976          | 1  | 0.047561383    | 0.370454348  | 0.572105604 |                 |
| A-Temperature                                                                                                                                                                       | 0.070100064          | 1  | 0.033869281    | -0.001699605 | 0.141899732 | 1.029638993     |
| B-pH                                                                                                                                                                                | 0.105208185          | 1  | 0.032114342    | 0.037128821  | 0.17328755  | 1.069259789     |
| A <sup>2</sup>                                                                                                                                                                      | -0.183370154         | 1  | 0.027743996    | -0.242184798 | -0.12455551 | 1.03079817      |
| B <sup>2</sup>                                                                                                                                                                      | -0.048790959         | 1  | 0.024531696    | -0.100795831 | 0.003213913 | 1.091888669     |

**Table S3:** ANOVA for Response Surface Reduced Quadratic Model  $MER_{max}$

| $MER_{max} = \text{Log}10(-37.71197957 + (0.651467497 * \text{Temperature}) + (5.199576927 * \text{pH}) + (-0.005140405 * \text{Temperature}^2) + (-0.354136403 * \text{pH}^2))$ |                      |    |                |              |              |                 |
|----------------------------------------------------------------------------------------------------------------------------------------------------------------------------------|----------------------|----|----------------|--------------|--------------|-----------------|
| Analysis of variance table [Partial sum of squares - Type III]                                                                                                                   |                      |    |                |              |              |                 |
| Source                                                                                                                                                                           | Sum of Squares       | df | Mean Square    | F Value      | p-value      |                 |
| Model                                                                                                                                                                            | 1.12140412           | 4  | 0.28035103     | 43.40916293  | < 0.0001     | significant     |
| A-Temperature                                                                                                                                                                    | 0.518242887          | 1  | 0.518242887    | 80.24400674  | < 0.0001     |                 |
| B-pH                                                                                                                                                                             | 0.179778162          | 1  | 0.179778162    | 27.83660023  | < 0.0001     |                 |
| A^2                                                                                                                                                                              | 0.425712088          | 1  | 0.425712088    | 65.91666659  | < 0.0001     |                 |
| B^2                                                                                                                                                                              | 0.105853507          | 1  | 0.105853507    | 16.39020952  | 0.0009       |                 |
| Residual                                                                                                                                                                         | 0.103333402          | 16 | 0.006458338    |              |              |                 |
| Lack of Fit                                                                                                                                                                      | 0.028823289          | 5  | 0.005764658    | 0.851042014  | 0.5420       | not significant |
| Pure Error                                                                                                                                                                       | 0.074510113          | 11 | 0.006773647    |              |              |                 |
| Cor Total                                                                                                                                                                        | 1.224737522          | 20 |                |              |              |                 |
| Std. Dev.                                                                                                                                                                        | 0.080363783          |    | R-Squared      | 0.915628124  |              |                 |
| Mean                                                                                                                                                                             | 1.75082873           |    | Adj R-Squared  | 0.894535155  |              |                 |
| C.V. %                                                                                                                                                                           | 4.590042511          |    | Pred R-Squared | 0.850831856  |              |                 |
| PRESS                                                                                                                                                                            | 0.182691823          |    | Adeq Precision | 24.09421267  |              |                 |
| Factor                                                                                                                                                                           | Coefficient Estimate | df | Standard Error | 95% CI Low   | 95% CI High  | VIF             |
| Intercept                                                                                                                                                                        | 1.914966472          | 1  | 0.027134711    | 1.857443453  | 1.97248949   |                 |
| A-Temperature                                                                                                                                                                    | 0.173094398          | 1  | 0.019323096    | 0.132131264  | 0.214057531  | 1.029638993     |
| B-pH                                                                                                                                                                             | 0.096666915          | 1  | 0.018321869    | 0.057826289  | 0.135507542  | 1.069259789     |
| A^2                                                                                                                                                                              | -0.128510129         | 1  | 0.015828499    | -0.162065048 | -0.094955209 | 1.03079817      |
| B^2                                                                                                                                                                              | -0.056661824         | 1  | 0.013995818    | -0.086331634 | -0.026992015 | 1.091888669     |

**Table S4:** ANOVA for Response Surface Reduced Quadratic Model  $MER_{max}$  (drum-type gas meter)

| $MER_{max}$ (drum-type gas meter) = $\text{Log}10(-34.59247361 + (0.750491255 * \text{Temperature}) + (3.550113117 * \text{pH}) + (-0.00597897 * \text{Temperature}^2) + (-0.241172243 * \text{pH}^2))$ |                      |    |                |              |              |                 |
|---------------------------------------------------------------------------------------------------------------------------------------------------------------------------------------------------------|----------------------|----|----------------|--------------|--------------|-----------------|
| Analysis of variance table [Partial sum of squares - Type III]                                                                                                                                          |                      |    |                |              |              |                 |
| Source                                                                                                                                                                                                  | Sum of Squares       | df | Mean Square    | F Value      | p-value      |                 |
| Model                                                                                                                                                                                                   | 1.100703308          | 4  | 0.275175827    | 26.22774156  | < 0.0001     | significant     |
| A-Temperature                                                                                                                                                                                           | 0.471330906          | 1  | 0.471330906    | 44.923805    | < 0.0001     |                 |
| B-pH                                                                                                                                                                                                    | 0.092877263          | 1  | 0.092877263    | 8.852379516  | 0.0089       |                 |
| A^2                                                                                                                                                                                                     | 0.575935754          | 1  | 0.575935754    | 54.89397194  | < 0.0001     |                 |
| B^2                                                                                                                                                                                                     | 0.049092907          | 1  | 0.049092907    | 4.679175856  | 0.0460       |                 |
| Residual                                                                                                                                                                                                | 0.167868561          | 16 | 0.010491785    |              |              |                 |
| Lack of Fit                                                                                                                                                                                             | 0.088179593          | 5  | 0.017635919    | 2.43440354   | 0.1016       | not significant |
| Pure Error                                                                                                                                                                                              | 0.079688968          | 11 | 0.007244452    |              |              |                 |
| Cor Total                                                                                                                                                                                               | 1.268571869          | 20 |                |              |              |                 |
| Std. Dev.                                                                                                                                                                                               | 0.102429415          |    | R-Squared      | 0.867671225  |              |                 |
| Mean                                                                                                                                                                                                    | 1.785148567          |    | Adj R-Squared  | 0.834589032  |              |                 |
| C.V. %                                                                                                                                                                                                  | 5.737865011          |    | Pred R-Squared | 0.728077663  |              |                 |
| PRESS                                                                                                                                                                                                   | 0.344953027          |    | Adeq Precision | 19.49840082  |              |                 |
| Factor                                                                                                                                                                                                  | Coefficient Estimate | df | Standard Error | 95% CI Low   | 95% CI High  | VIF             |
| Intercept                                                                                                                                                                                               | 1.946061369          | 1  | 0.034585139    | 1.872744149  | 2.019378589  |                 |
| A-Temperature                                                                                                                                                                                           | 0.165074236          | 1  | 0.024628674    | 0.11286378   | 0.217284692  | 1.029638993     |
| B-pH                                                                                                                                                                                                    | 0.069480686          | 1  | 0.023352538    | 0.019975517  | 0.118985854  | 1.069259789     |
| A^2                                                                                                                                                                                                     | -0.149474252         | 1  | 0.020174559    | -0.192242407 | -0.106706096 | 1.03079817      |
| B^2                                                                                                                                                                                                     | -0.038587559         | 1  | 0.017838676    | -0.076403863 | -0.000771255 | 1.091888669     |

**Table S5:** ANOVA for Response Surface Reduced Quadratic Model cum. CH<sub>4</sub> production

| $\text{cum. CH}_4 \text{ production} = (-139254.2929 + (2307.001118 * \text{Temperature}) + (19715.7902 * \text{pH}) + (-18.85017552 * \text{Temperature}^2) + (-1370.515378 * \text{pH}^2))$ |                      |    |                |              |              |                 |
|-----------------------------------------------------------------------------------------------------------------------------------------------------------------------------------------------|----------------------|----|----------------|--------------|--------------|-----------------|
| Analysis of variance table [Partial sum of squares - Type III]                                                                                                                                |                      |    |                |              |              |                 |
| Source                                                                                                                                                                                        | Sum of Squares       | df | Mean Square    | F Value      | p-value      |                 |
| Model                                                                                                                                                                                         | 8446243.846          | 4  | 2111560.961    | 8.265314498  | 0.0008       | significant     |
| A-Temperature                                                                                                                                                                                 | 874877.6436          | 1  | 874877.6436    | 3.424546581  | 0.0828       |                 |
| B-pH                                                                                                                                                                                          | 860031.46            | 1  | 860031.46      | 3.366433943  | 0.0852       |                 |
| A <sup>2</sup>                                                                                                                                                                                | 5724691.389          | 1  | 5724691.389    | 22.4082447   | 0.0002       |                 |
| B <sup>2</sup>                                                                                                                                                                                | 1585374.735          | 1  | 1585374.735    | 6.205655919  | 0.0241       |                 |
| Residual                                                                                                                                                                                      | 4087560.781          | 16 | 255472.5488    |              |              |                 |
| Lack of Fit                                                                                                                                                                                   | 946365.287           | 5  | 189273.0574    | 0.662806131  | 0.6593       | not significant |
| Pure Error                                                                                                                                                                                    | 3141195.494          | 11 | 285563.2267    |              |              |                 |
| Cor Total                                                                                                                                                                                     | 12533804.63          | 20 |                |              |              |                 |
| Std. Dev.                                                                                                                                                                                     | 505.4429234          |    | R-Squared      | 0.673877095  |              |                 |
| Mean                                                                                                                                                                                          | 1528.420456          |    | Adj R-Squared  | 0.592346368  |              |                 |
| C.V. %                                                                                                                                                                                        | 33.06962566          |    | Pred R-Squared | 0.397662669  |              |                 |
| PRESS                                                                                                                                                                                         | 7549578.421          |    | Adeq Precision | 9.466851798  |              |                 |
| Factor                                                                                                                                                                                        | Coefficient Estimate | df | Standard Error | 95% CI Low   | 95% CI High  | VIF             |
| Intercept                                                                                                                                                                                     | 2160.420457          | 1  | 170.6620487    | 1798.633076  | 2522.207839  |                 |
| A-Temperature                                                                                                                                                                                 | 224.9002801          | 1  | 121.5313878    | -32.7347529  | 482.5353131  | 1.029638993     |
| B-pH                                                                                                                                                                                          | 211.4299759          | 1  | 115.234232     | -32.85568309 | 455.7156349  | 1.069259789     |
| A <sup>2</sup>                                                                                                                                                                                | -471.254388          | 1  | 99.55234348    | -682.2959284 | -260.2128476 | 1.03079817      |
| B <sup>2</sup>                                                                                                                                                                                | -219.2824605         | 1  | 88.02581397    | -405.8888499 | -32.67607103 | 1.091888669     |
